# Supplementary material for: The CRBN, CUL4A and DDB1 Expression Predicts the Response to Immunomodulatory Drugs and Survival of Multiple Myeloma Patients
Source: MDPI journal article supplement (doi:10.3390/jcm10122683), 2021-06-18

## Supplementary materials

**Supplementary Table S1.** Overall clinical patients' characteristics with detailed division into thalidomide and lenalidomide-based treatment.

Abbreviations: ISS - International Staging System; FLC – free light chain; BM – bone marrow; IMiD – immunomodulatory drug; LEN – lenalidomide; THAL – thalidomide; LD – lenalidomide, dexamethasone; TD – thalidomide, dexamethasone; CTD – cyclophosphamide, thalidomide, dexamethasone; VTD – bortezomib, thalidomide, dexamethasone; MPT – melphalan, prednisone, thalidomide

| Parameter                                      |           | LEN-based treatment<br>(n=49) | THAL-based treatment<br>(n=81) | P-value      |
|------------------------------------------------|-----------|-------------------------------|--------------------------------|--------------|
| Age, years                                     |           | 61.4 (32-80)                  | 63 (47-85)                     | 0.226        |
| Sex                                            | male      | 25 (51%)                      | 27 (34%)                       | <b>0.046</b> |
|                                                | female    | 24 (49%)                      | 54 (66%)                       |              |
| Isotype of M-protein                           | IgG       | 33 (68%)                      | 53 (65%)                       | 0.279        |
|                                                | IgA       | 8 (16%)                       | 21 (26%)                       |              |
|                                                | IgE       | 1 (2%)                        | 0                              |              |
|                                                | FLC       | 7 (14%)                       | 7 (9%)                         |              |
| ISS                                            | stage I   | 12 (24%)                      | 11 (12%)                       | 0.052        |
|                                                | stage II  | 12 (24%)                      | 30 (37%)                       |              |
|                                                | stage III | 8 (16%)                       | 28 (36%)                       |              |
|                                                | no data   | 17 (36%)                      | 12 (15%)                       |              |
| Albumin, g/dl                                  |           | 3.67 (±0.54)                  | 3.56 (±0.54) n=79              | 0.363        |
| β2-microglobulin, mg/l                         |           | 3.7 (1.56, 18.64) n=31        | 4.6 (1.75, 26.15) n=69         | 0.073        |
| Serum M-protein, g/dl                          |           | 3.53 (±1,80) n=45             | 3.63 (±2,12)                   | 0.723        |
| Serum FLC ratio                                | <100      | 14 (29%)                      | 29 (36%)                       | 0.267        |
|                                                | ≥100      | 19 (39%)                      | 24 (30%)                       |              |
|                                                | no data   | 16 (32%)                      | 28 (34%)                       |              |
| Haemoglobin, g/dl                              | < 10      | 18 (37%)                      | 43 (53%)                       | 0.071        |
|                                                | ≥ 10      | 31 (63%)                      | 38 (47%)                       |              |
| Calcium, mmol/l                                | ≤ 2,55    | 42 (86%)                      | 66 (82%)                       | 0.631        |
|                                                | > 2,55    | 7 (14%)                       | 14 (17%)                       |              |
|                                                | no data   | 0                             | 1 (1%)                         |              |
| Creatinine, mg/dl                              | ≤ 2 mg/dl | 47 (96%)                      | 75 (93%)                       | 0.444        |
|                                                | > 2 mg/dl | 2 (4%)                        | 6 (7%)                         |              |
| Osteolytic lesions                             | yes       | 14 (28%)                      | 52 (64%)                       | <b>0.001</b> |
|                                                | no        | 29 (59%)                      | 29 (36%)                       |              |
|                                                | no data   | 6 (13%)                       | 0                              |              |
| BM plasma cells, %                             |           | 65 (17.5-95) n=48             | 70 (12.5-95) n=80              |              |
| Cycles of IMiD-based treatment (median, range) | 6 (1-56)  | 9.5 (3-56)                    | 6 (1-24)                       |              |

|                          |     |           |          |  |
|--------------------------|-----|-----------|----------|--|
| Prior lines of treatment | n/a | 4 (1-8)   | n/a      |  |
| Treatment regimen        | LD  | 49 (100%) |          |  |
|                          | TD  |           | 2 (2%)   |  |
|                          | CTD |           | 62 (77%) |  |
|                          | VTD |           | 2 (2%)   |  |
|                          | MPT |           | 15 (19%) |  |

**Supplementary Figure S1.** The immunohistochemical characterization of malignant plasma cells (#5 case): A – HE; B – CD138; C – positive IZKF3; D – positive CUL4A; E – positive IKZF1; F – positive CRBN; G – negative DDB1; (all photographs in 600x magnification).

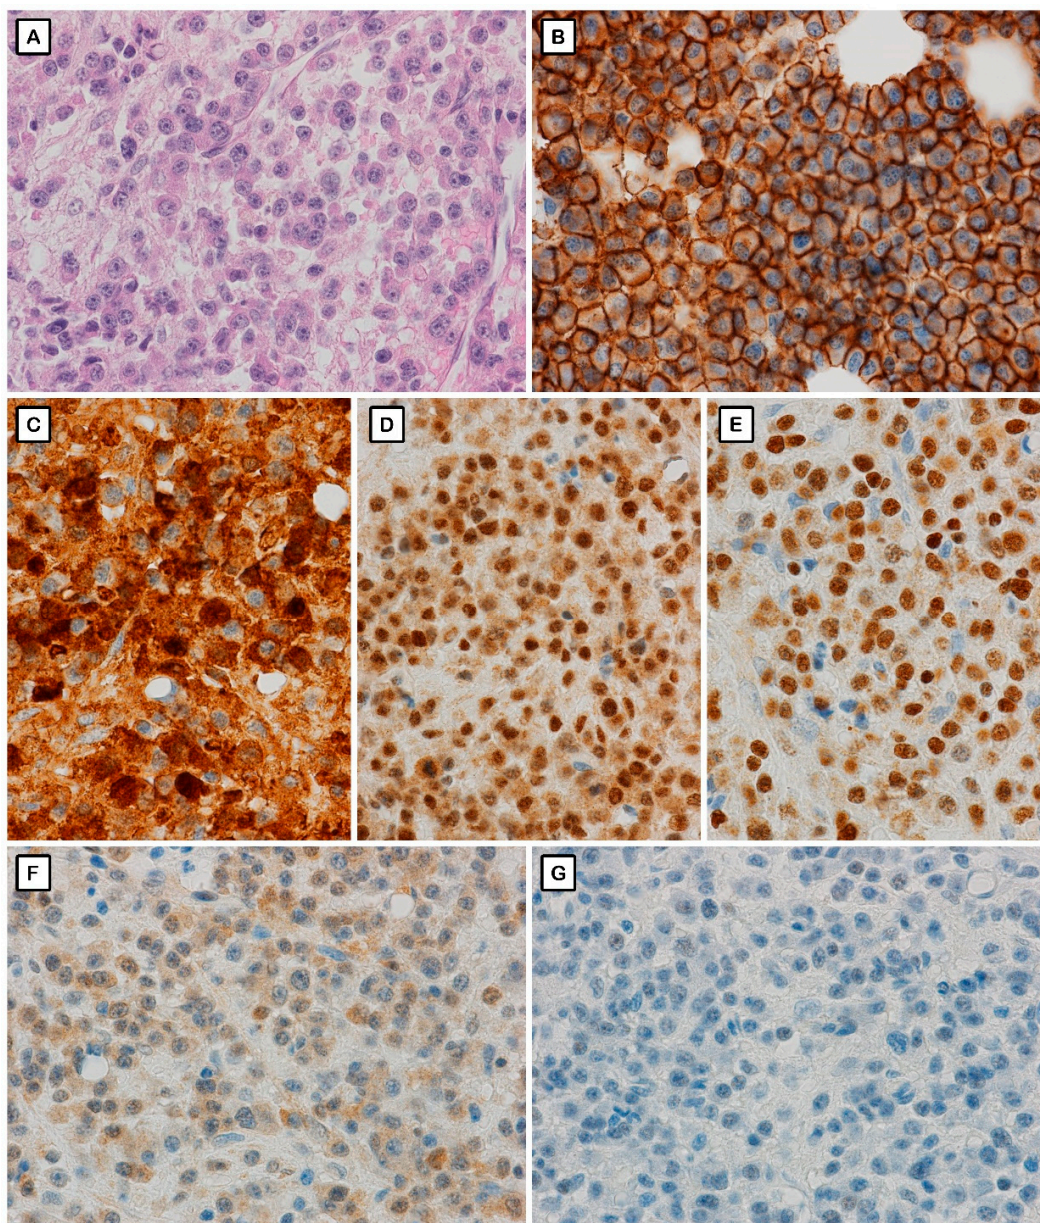



**Supplementary Figure S2.** Positive and negative DDB1 IHC profiles in multiple myeloma; case #1: A – HE; B – CD138; C – DDB1 positive (>30% of strongly positive cells); case #2: D - HE; E – CD138; F – DDB1 negative ( $\leq 30\%$  of strongly positive cells); (arrow – atypical plasma cell with triple nuclei; all photographs in 600x magnification).

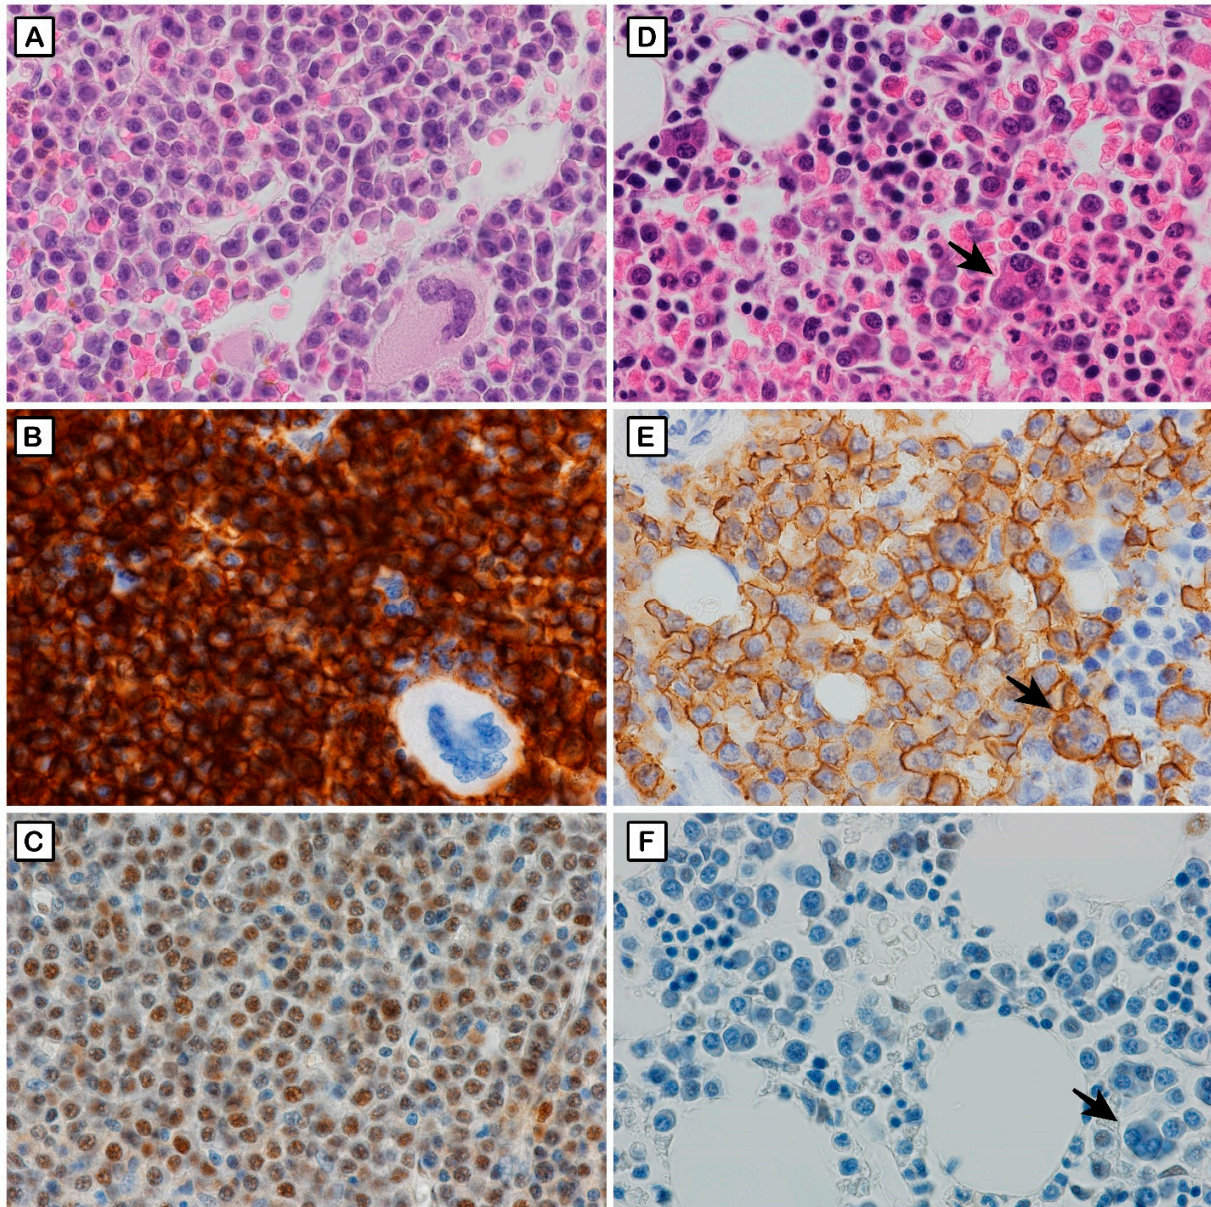

Supplement: s1 [file s1]
